# Supplementary material
Source: publisher figshare collection journal article supplement (https://gsapubs.figshare.com/ndownloader/files/23301620)
Supplement: Supplementary file 1 [file 23301620]

## Sheet: S1 Locations
Table S1. Sample locations of Sacawee block quartzofeldspathic gneisses investigated in this study.
Note: all samples in UTM zone T13; coordinates given using WGS84 datum.
Sample number		Easting	Northing
~3.3 Ga gneisses
04TC27		260416	4723562
04TC6		261380	4721488
10GR3F		261523	4721127
11GR-01		262058	4716650
10GR5F		262373	4720675
04TC18		262777	4725918
12SM-22		264303	4715040
10MB1		265128	4723393
11SM-13		266221	4715342
12SM-27		267911	4719513
12SM-24		268276	4719731
11SM7F		272499	4720989
10SM10		273152	4720781
10SM11		273152	4720781
11SM1		273705	4720835
11SM5F		273954	4720823
20140530WS-A		292316	4727043
00BG8		304900	4723535
00BG29		305008	4723760
00BG30		305010	4723800
00BG19		305260	4724090
00BG20		305290	4724050
00BG23		305470	4724340
00BG22		305520	4724340
00BG05		305549	4723760
15BG8		308463	4724058
Older Gneisses
10GR1F		260640	4718617
93SWP5		260640	4718617
10GR4F		261557	4720957
12GR-02		261936	4720382
12GR-06		262125	4720320
14GR-02		262171	4719400
10GR2F		262174	4719378
14GR-01		262373	4720675
10SM2		266137	4715565
11SM14		266138	4715557
12SM-16		267320	4717237
14CS-03		275331	4723066
11BBL-02		317088	4716869
11BBL-01		317128	4716852
03BBL39		317313	4716710
00SR01		334096	4719566
13SR1		334103	4719630
01SR-01		334293	4719694
13SR3		334556	4719620
01SR-02		334562	4719573
13SR5		335012	4719698

## Sheet: S2 10MB01
Table DR2. Summary of SHRIMP U-Pb zircon results for sample 10MB01
									Radiogenic Ratios								Age (Ma)
Grain.	U	Th	Th/U	206Pb*	204Pb/	f206	206Pb/		207Pb/		207Pb/				206Pb/		207Pb/		%
spot	(ppm)	(ppm)		(ppm)	206Pb	%	238U	±	235U		206Pb	±	r		238U	±	206Pb	±	Disc
1.1	702.16	1012.53	1.44203	250.51	0.00823197	10.6276	0.37115	0.00552024	11.6295	0.333106	0.37115	0.00552024	0.519264		2034.81	25.9532	3032.81	39.2401	32.9068
1.2	259.873	280.546	1.07955	142.356	8.38285e-05	0.102183	0.636981	0.00718499	23.6428	0.273749	0.636981	0.00718499	0.974195		3177.14	28.2944	3301.36	4.09967	3.7626
3.1	3614.5	1105.2	0.305769	957.91	0.00706819	9.4521	0.279326	0.00284787	7.73445	0.0859003	0.279326	0.00284787	0.918004		1587.96	14.3502	2832.91	7.18406	43.9458
4.1	2910.75	3600.77	1.23706	665.738	0.00732934	9.25423	0.241591	0.00250944	8.13344	0.0974636	0.241591	0.00250944	0.866818		1394.96	13.0292	3147.36	9.48798	55.6783
5.1	458.733	335.456	0.731267	241.496	0.000154161	0.187956	0.611631	0.00658536	22.6895	0.249787	0.611631	0.00658536	0.978016		3076.53	26.341	3300.5	3.60149	6.78597
6.1	254.601	177.297	0.696373	148.054	-	<0.01	0.676886	0.00766095	25.117	0.299275	0.676886	0.00766095	0.949873		3332.4	29.4508	3300.93	5.8439	-0.953493
7.1	3609.22	1464.39	0.405737	815.955	0.015049	20.2653	0.209825	0.00228726	5.75936	0.116504	0.209825	0.00228726	0.538879		1227.88	12.1874	2818.62	27.8303	56.4367
8.1	224.041	77.1357	0.344293	126.218	2.16339e-05	0.0266678	0.655593	0.00750014	23.4987	0.27611	0.655593	0.00750014	0.973637		3250.02	29.2034	3246.47	4.22251	-0.109299
9.1	520.998	392.845	0.754024	202.637	0.00225648	2.80433	0.440034	0.00515951	15.4345	0.190323	0.440034	0.00515951	0.950875		2350.79	23.0969	3212.31	6.03022	26.8192
10.1	637.62	446.11	0.699648	313.964	0.000776705	0.963795	0.567634	0.00599411	19.9535	0.216351	0.567634	0.00599411	0.973904		2898.1	24.6489	3215.75	3.88636	9.87796
11.1	5164.56	1224.16	0.237031	836.711	0.00819281	11.1449	0.167564	0.0017892	4.37342	0.0575169	0.167564	0.0017892	0.811905		998.676	9.87864	2736.05	12.6341	63.4993
12.1	470.271	348.403	0.740855	241.407	6.8078e-05	0.0839513	0.597025	0.00643456	21.3753	0.234584	0.597025	0.00643456	0.982061		3017.84	25.9732	3244.69	3.26064	6.99131
13.1	1833.4	320.244	0.174672	566.527	0.000697832	0.867986	0.35656	0.00372767	12.438	0.1622	0.35656	0.00372767	0.801689		1965.85	17.714	3203.63	12.322	38.6368
14.1	334.121	167.016	0.499866	173.677	0.000323912	0.400873	0.60263	0.0066733	21.3438	0.243626	0.60263	0.0066733	0.970149		3040.42	26.8427	3227.64	4.36744	5.80032
14.2	160.341	107.424	0.669974	111.696	2.83246e-05	0.0315876	0.810609	0.00957411	42.3717	0.511382	0.810609	0.00957411	0.978628		3827	34.0873	3828.22	3.75092	0.0317388
15.1	335.91	134.444	0.400239	185.08	6.00035e-06	0.00733994	0.641299	0.0085857	23.5421	0.336103	0.641299	0.0085857	0.937752		3194.12	33.7214	3284.05	7.78872	2.7384
16.1	203.938	156.356	0.766682	110.039	0.0001882	0.218577	0.626695	0.0072131	26.8743	0.366672	0.626695	0.0072131	0.843579		3136.5	28.5847	3525.96	11.3036	11.0454
16.1	1007.12	1824.29	1.81138	169.677	0.00192658	2.28044	0.191636	0.00202377	7.8006	0.0901766	0.191636	0.00202377	0.91352		1130.23	10.948	3445.33	7.29759	67.1952
17.1	4711.61	1042.08	0.221173	376.268	0.00643254	8.96894	0.0846202	0.000874895	2.01082	0.0384205	0.0846202	0.000874895	0.541119		523.642	5.19992	2580.54	26.8334	79.7081
18.1	417.467	226.906	0.543529	187.737	0.000634307	0.785128	0.51935	0.0056985	18.3963	0.230053	0.51935	0.0056985	0.877414		2696.42	24.178	3227.82	9.46528	16.463
18.2	1087.07	800.08	0.735995	247.567	0.00842043	10.7598	0.236565	0.00259251	7.67424	0.122594	0.236565	0.00259251	0.686021		1368.81	13.5152	3088.31	18.5458	55.6776
19.1	110.893	137.988	1.24434	45.4469	0.000688677	0.826217	0.473102	0.0060248	18.4534	0.304227	0.473102	0.0060248	0.772442		2497.15	26.365	3378.96	16.3281	26.0971
20.1	148.167	110.882	0.748357	68.5904	0.00026186	0.318903	0.537133	0.00639745	19.9995	0.250701	0.537133	0.00639745	0.950141		2771.44	26.8296	3306.28	6.1295	16.1767
21.1	131.193	173.545	1.32282	60.945	0.00104745	1.30826	0.533659	0.00666793	18.3837	0.262417	0.533659	0.00666793	0.875325		2756.85	28.0272	3183.78	10.9281	13.4095
21.2	1054.14	1956.1	1.85565	323.095	0.0040608	5.04975	0.338755	0.00456894	11.9002	0.310981	0.338755	0.00456894	0.516118		1880.68	22.0005	3214.72	35.3511	41.4978
Notes :		1. Uncertainties given at the one s level.
		2. f206 % denotes the percentage of 206Pb that is common Pb.
		3. Correction for common Pb made using the measured 204Pb/206Pb ratio.
		4. For % Disc., 0% denotes a concordant analysis.

## Sheet: S3 11SM13
Table DR3. Summary of SHRIMP U-Pb zircon results for sample 11SM13.
									Radiogenic Ratios								Age (Ma)
Grain.	U	Th	Th/U	206Pb*	204Pb/	f206	206Pb/		207Pb/		207Pb/				206Pb/		207Pb/		%
spot	(ppm)	(ppm)		(ppm)	206Pb	%	238U	±	235U		206Pb	±	r		238U	±	206Pb	±	Disc
1.1	355.585	137.187	0.385808	154.879	0.000908308	1.22596	0.500781	0.00570581	13.2835	0.24353	0.192382	0.00276313	0.621485		2617.15	24.5086	2762.63	23.5769	5.26607
2.1	456.747	1672.64	3.66208	259.849	0.0105947	13.1583	0.575081	0.00663897	20.5644	0.377086	0.259349	0.00369487	0.629573		2928.65	27.1716	3242.76	22.4512	9.6864
3.1	2587.21	139.3	0.0538419	561.857	0.00198315	2.81311	0.245674	0.00271215	5.43645	0.0728209	0.160493	0.00121754	0.824164		1416.12	14.0355	2460.86	12.8201	42.454
4.1	5740.39	5272.74	0.918534	1233.33	0.0130169	17.6641	0.205912	0.00211293	5.47261	0.0699852	0.192757	0.00147109	0.802401		1207	11.2951	2765.83	12.5243	56.3602
5.1	921.613	306.433	0.332496	451.619	0.00646476	7.9121	0.52527	0.00556315	19.4959	0.257646	0.26919	0.00212775	0.801415		2721.49	23.5121	3301.31	12.3996	17.5634
6.1	1526.97	428.231	0.280445	584.219	0.00140297	1.92642	0.436771	0.00450522	10.9002	0.123499	0.181	0.000848428	0.910404		2336.17	20.2137	2662.06	7.76708	12.2419
7.1	2225.61	662.847	0.297828	250.121	0.00903573	12.5799	0.114359	0.00153804	2.74427	0.151342	0.174043	0.00930839	0.243874		698.011	8.89735	2596.91	89.1759	73.1214
8.1	2203.82	1147.69	0.520773	243.127	0.0133428	19.0137	0.103998	0.00302635	2.30017	0.427414	0.160411	0.0294395	0.156605		637.797	17.6713	2460	310.169	74.0732
9.1	3204.45	183.658	0.0573133	983.741	0.000287435	0.399624	0.355913	0.00361354	8.4728	0.0897471	0.172656	0.000521346	0.958507		1962.77	17.1798	2583.56	5.04122	24.0283
10.1	2559.06	216.722	0.084688	776.646	0.00117673	1.63866	0.347475	0.00356636	8.23249	0.0880245	0.171833	0.00051503	0.959907		1922.53	17.0617	2575.58	5.00788	25.3553
11.1	422.606	505.559	1.19629	192.886	0.00589301	7.17834	0.49314	0.0057281	18.5518	0.356743	0.272844	0.00418132	0.604047		2584.25	24.7302	3322.44	24.0017	22.2184
12.1	345.258	370.547	1.07325	186.896	0.00563114	6.87644	0.586777	0.00655032	21.8928	0.307201	0.2706	0.00230059	0.795552		2976.34	26.6112	3309.5	13.3286	10.0669
13.1	3005.93	2473.8	0.822972	253.715	0.0229935	33.9484	0.0648942	0.00116606	1.26666	0.114821	0.141565	0.0125779	0.198225		405.321	7.05885	2246.43	153.542	81.9571
14.1	2619.55	900.15	0.343627	552.523	0.00227727	2.86733	0.238476	0.00323478	8.02301	0.237751	0.244001	0.00642867	0.457735		1378.77	16.8374	3146.25	41.8409	56.1774
15.1	3988.46	1040.31	0.26083	897.3	0.00967558	13.4069	0.226763	0.00237769	5.54524	0.0904013	0.177356	0.00221397	0.643174		1317.51	12.4943	2628.3	20.7511	49.8721
16.1	2075.18	430.196	0.207305	371.453	0.00128794	1.64703	0.204924	0.00212612	6.54221	0.0914401	0.231543	0.00216849	0.742306		1201.72	11.3749	3062.74	14.9754	60.7634
17.1	2514.22	100.759	0.0400757	210.125	0.000275888	0.390203	0.096902	0.00100577	2.16365	0.0580737	0.161939	0.00400842	0.386699		596.228	5.91084	2476.01	41.766	75.9198
18.1	481.683	494.901	1.02744	256.442	0.00218058	2.65079	0.603276	0.00657688	22.6688	0.262924	0.272528	0.0010789	0.939945		3043.03	26.4442	3320.63	6.20117	8.36001
19.1	1121.55	593.779	0.529427	446.011	0.00158518	2.06238	0.453349	0.0047054	13.6712	0.163812	0.218711	0.0013095	0.86621		2410.12	20.8711	2971.23	9.64819	18.8846
20.1	593.866	1252.73	2.10945	273.659	0.00784228	9.68193	0.484454	0.00655696	17.5478	0.598915	0.262705	0.00823113	0.396558		2546.63	28.4744	3263	49.2979	21.9542
21.1	2502.68	67.3597	0.026915	171.051	0.00650902	9.2725	0.0721797	0.00083627	1.58108	0.050025	0.158868	0.00467743	0.366183		449.274	5.02802	2443.65	49.8413	81.6146
22.1	2258.78	149.359	0.0661236	682.71	0.000354858	0.491438	0.350089	0.00382799	8.45588	0.125794	0.175178	0.00176704	0.735008		1935.02	18.2779	2607.74	16.8013	25.7968
23.1	661.172	377.051	0.570276	234.566	0.000342755	0.458674	0.411066	0.00432406	11.229	0.124053	0.198119	0.000668813	0.952169		2219.79	19.7544	2810.77	5.5173	21.0254
24.1	9123.11	2074.95	0.227439	1148.28	0.0468098	62.4768	0.0549745	0.00487868	1.80013	0.816274	0.237487	0.105607	0.195708		344.99	29.8111	3103.21	708.679	88.8828
Notes :		1. Uncertainties given at the one s level.
		2. f206 % denotes the percentage of 206Pb that is common Pb.
		3. Correction for common Pb made using the measured 204Pb/206Pb ratio.
		4. For % Disc., 0% denotes a concordant analysis.

## Sheet: S4 11SM07
Table DR4. Summary of SHRIMP U-Pb zircon results for sample 11SM07.
									Radiogenic Ratios								Age (Ma)
Grain.	U	Th	Th/U	206Pb*	204Pb/	f206	206Pb/		207Pb/		207Pb/				206Pb/		207Pb/		%
spot	(ppm)	(ppm)		(ppm)	206Pb	%	238U	±	235U		206Pb	±	r		238U	±	206Pb	±	Disc
1.1	548.498	406.329	0.740802	308.964	1.98259e-05	0.0241902	0.655516	0.00698692	24.2554	0.26268	0.268363	0.000514575	0.984201		3249.72	27.2064	3296.49	3.00908	1.41866
2.1	100.896	63.1651	0.626041	57.048	4.32273e-05	0.052945	0.657798	0.00867278	24.0545	0.388494	0.265218	0.00247389	0.816355		3258.6	33.7245	3277.97	14.6591	0.591063
3.1	242.007	193.991	0.801592	138.886	8.61597e-06	0.0104326	0.667943	0.00766771	25.3015	0.309715	0.27473	0.00116752	0.937802		3297.93	29.6349	3333.23	6.6503	1.05907
4.1	487.522	265.497	0.544585	196.649	0.00246822	3.02227	0.45533	0.00497325	16.7399	0.215067	0.266641	0.00180376	0.850149		2418.91	22.0291	3286.38	10.6243	26.396
4.2	543.765	245.817	0.452065	190.611	0.0056692	7.04172	0.379298	0.00511756	13.416	0.425885	0.256532	0.00737134	0.425024		2073	23.9179	3225.53	45.344	35.7314
5.1	797.407	823.881	1.0332	374.867	0.00161523	1.98551	0.536344	0.00581687	19.4495	0.255826	0.263005	0.00195735	0.824538		2768.13	24.4073	3264.8	11.7079	15.2129
6.1	379.646	343.427	0.9046	203.291	1.49345e-05	0.0183406	0.623186	0.00683752	22.5999	0.25341	0.26302	0.000608148	0.978508		3122.58	27.1549	3264.89	3.63743	4.35858
7.1	331.414	113.539	0.34259	182.153	9.52404e-06	0.0116517	0.639692	0.00710072	23.4747	0.26879	0.266151	0.000747709	0.969434		3187.81	27.9163	3283.49	4.41317	2.91404
8.1	161.466	105.968	0.656287	90.3959	1e-32	1.22823e-29	0.651663	0.0079024	23.6223	0.300539	0.262904	0.0010119	0.953141		3234.7	30.843	3264.19	6.05532	0.903615
9.1	213.222	168.145	0.788593	122.149	1.15552e-05	0.0140646	0.666735	0.00783198	24.8561	0.301063	0.270383	0.000798393	0.969828		3293.26	30.2917	3308.25	4.6297	0.453132
10.1	133.933	94.7131	0.70717	77.8935	1.59299e-05	0.0193329	0.676841	0.00840427	25.4595	0.329913	0.272811	0.00101123	0.958215		3332.23	32.3092	3322.25	5.80548	-0.300166
11.1	266.746	229.765	0.861364	119.539	0.00251348	3.08915	0.505523	0.00599908	18.3727	0.29792	0.263592	0.00291277	0.731843		2637.49	25.6871	3268.3	17.3793	19.3009
12.1	306.562	76.2457	0.248712	174.317	7.8494e-05	0.097706	0.661231	0.00738642	22.9863	0.266421	0.252125	0.000779266	0.963788		3271.94	28.663	3198.16	4.88798	-2.30697
13.1	197.281	124.481	0.630981	90.3483	0.00162004	1.98265	0.522509	0.00618897	19.2102	0.248952	0.266647	0.00140207	0.913988		2709.81	26.2046	3286.41	8.2581	17.5449
14.1	1570.26	1007.29	0.64148	818.229	0.000200242	0.243593	0.605061	0.00625441	22.6028	0.236394	0.270933	0.00043116	0.988356		3050.2	25.1196	3311.44	2.49451	7.88897
16.1	89.2684	57.6871	0.646221	33.0618	0.00210115	2.68418	0.419535	0.00701062	13.4586	0.279112	0.232664	0.00285761	0.805765		2258.37	31.8367	3070.46	19.6267	26.4486
17.1	101.384	85.0599	0.83899	55.5816	1.75379e-05	0.0215531	0.638007	0.00849792	23.0861	0.324131	0.262436	0.00116526	0.948676		3181.18	33.4438	3261.39	6.98701	2.45946
18.1	493.769	72.3663	0.146559	143.585	0.00107836	1.48962	0.333445	0.00357604	8.13707	0.0993184	0.176987	0.00103144	0.878652		1855.06	17.288	2624.84	9.69089	29.3268
19.1	63.8949	57.7275	0.903476	37.141	1e-32	1.21289e-29	0.676618	0.00976773	25.4973	0.400432	0.273306	0.00169012	0.919212		3331.37	37.5559	3325.1	9.68329	-0.188667
20.1	227.17	2.15711	0.00949555	122.632	9.18023e-06	0.0111937	0.628292	0.00846557	23.2948	0.337333	0.268904	0.00142677	0.930457		3142.83	33.5152	3299.64	8.32451	4.75244
21.1	91.2568	52.9383	0.580103	50.3979	1e-32	1.21698e-29	0.642841	0.00862743	23.9758	0.37571	0.2705	0.00218828	0.856441		3200.18	33.8535	3308.93	12.6832	3.28654
22.1	104.497	64.4842	0.617089	59.2785	5.70461e-05	0.0689776	0.659854	0.00889984	25.1037	0.397362	0.275924	0.00228593	0.852093		3266.59	34.5645	3340.01	12.9579	2.19835
22.1	195.575	184.163	0.941648	111.493	1.55363e-05	0.0190326	0.663447	0.00768811	24.2454	0.425093	0.265047	0.00348734	0.660936		3280.53	29.794	3276.96	20.6793	-0.108963
23.1	297.729	295.93	0.993957	170.559	-1.94788e-07	-0.00023603	0.666824	0.00742891	25.2023	0.320011	0.274112	0.00166995	0.877384		3293.6	28.7312	3329.71	9.53619	1.08433
24.1	102.966	78.4976	0.762364	59.3841	1.5208e-05	0.01847	0.6712	0.00867287	25.1917	0.341505	0.27221	0.00111598	0.953174		3310.51	33.4543	3318.8	6.42265	0.250045
25.1	79.5539	61.922	0.778365	45.6024	7.3886e-05	0.0896577	0.666641	0.00891629	25.0888	0.355542	0.272952	0.00127845	0.943802		3292.9	34.4874	3323.07	7.33532	0.907895
26.1	204.855	131.278	0.640833	111.001	0.00010459	0.127333	0.629916	0.00721966	23.4706	0.285761	0.270234	0.00111013	0.941359		3149.26	28.5542	3307.38	6.44137	4.78101
27.1	547.925	348.426	0.6359	209.766	0.00175085	2.14844	0.436052	0.00505224	15.9038	0.233855	0.264521	0.00239498	0.787951		2332.94	22.6794	3273.84	14.2335	28.7398
28.1	157.912	140.885	0.892173	90.3753	2.36671e-05	0.0287727	0.665987	0.00797876	24.9187	0.309533	0.271368	0.000890593	0.964467		3290.36	30.8732	3313.95	5.14335	0.711637
29.1	318.154	198.316	0.623334	178.981	8.34428e-05	0.101655	0.654163	0.00722543	24.3225	0.275243	0.269663	0.000663926	0.976046		3244.45	28.1581	3304.07	3.86147	1.80441
30.1	96.0642	57.407	0.59759	55.0344	1.63043e-05	0.0198225	0.666719	0.00920711	24.9424	0.393027	0.271328	0.00205906	0.876388		3293.19	35.6106	3313.72	11.8935	0.61929
Notes :		1. Uncertainties given at the one s level.
		2. f206 % denotes the percentage of 206Pb that is common Pb.
		3. Correction for common Pb made using the measured 204Pb/206Pb ratio.
		4. For % Disc., 0% denotes a concordant analysis.

## Sheet: S5 10SM10
Table DR5. Summary of SHRIMP U-Pb zircon results for sample 10SM10.
									Radiogenic Ratios								Age (Ma)
Grain.	U	Th	Th/U	206Pb*	204Pb/	f206	206Pb/		207Pb/		207Pb/				206Pb/		207Pb/		%
spot	(ppm)	(ppm)		(ppm)	206Pb	%	238U	±	235U		206Pb	±	r		238U	±	206Pb	±	Disc
1.1	209.464	129.521	0.618345	118.291	3.34731e-05	0.0408946	0.657085	0.00773708	24.2167	0.324052	0.267296	0.00169922	0.879947		3255.83	30.0989	3290.23	9.98105	1.04563
2.1	71.3466	53.0197	0.743129	40.7953	-	<0.01	0.665569	0.0094748	24.7816	0.373038	0.270044	0.00132129	0.945699		3288.75	36.6712	3306.28	7.67265	0.530277
3.1	1243.04	60.4405	0.0486233	689.07	0.000113964	0.140517	0.644355	0.00701286	23.0815	0.253198	0.259799	0.000356631	0.99214		3206.11	27.4927	3245.49	2.16279	1.21314
3.2	194.696	151.74	0.779368	92.293	0.000236383	0.287824	0.550195	0.00782727	20.4961	0.426424	0.270181	0.0041016	0.683793		2825.98	32.5494	3307.07	23.8042	14.5473
3.3	368.25	93.3103	0.253389	211.599	-	<0.01	0.668849	0.00731598	24.987	0.292989	0.270947	0.00114464	0.932842		3301.43	28.2601	3311.52	6.62202	0.304612
4.1	231.71	144.567	0.623913	131.744	1.63978e-05	0.0200367	0.66169	0.00760188	24.3735	0.300513	0.267155	0.00119562	0.931796		3273.72	29.491	3289.4	7.02711	0.476823
5.1	177.536	78.7237	0.443424	100.613	-	<0.01	0.659666	0.00788678	24.4423	0.302235	0.268731	0.000848094	0.966881		3265.86	30.6335	3298.63	4.95181	0.993574
5.1	100.313	75.5887	0.753528	51.6858	0.000110903	0.134915	0.59894	0.00817488	22.3693	0.336643	0.270875	0.00171722	0.906945		3025.57	32.9585	3311.1	9.9375	8.62335
6.1	272.979	80.2391	0.293938	153.774	-	<0.01	0.655708	0.00739108	24.2635	0.305017	0.268375	0.00149365	0.896657		3250.47	28.7768	3296.55	8.73399	1.39802
6.2	150.336	67.5909	0.449599	87.5659	1.20778e-05	0.0147076	0.677899	0.00832343	25.2353	0.321693	0.269986	0.000925434	0.963172		3336.29	31.9782	3305.94	5.37522	-0.91799
7.1	194.056	109.394	0.563723	85.1194	4.10218e-05	0.0499556	0.510317	0.00603892	18.996	0.234543	0.269974	0.000951139	0.958427		2657.98	25.7756	3305.87	5.52481	19.5982
8.1	201.376	108.585	0.539217	110.188	8.25035e-06	0.0100188	0.636857	0.00754394	23.9113	0.329341	0.272307	0.00191373	0.860029		3176.65	29.7102	3319.36	11.0094	4.29934
9.1	219.908	90.6387	0.412166	77.2482	6.15556e-05	0.0748522	0.408581	0.00488499	15.2778	0.198269	0.271195	0.0013687	0.921282		2208.43	22.3563	3312.95	7.91013	33.3394
10.1	262.792	147.257	0.560356	149.604	8.08573e-06	0.00983871	0.662592	0.00753199	24.7241	0.288988	0.270628	0.000736277	0.972534		3277.21	29.204	3309.67	4.26517	0.980638
11.1	559.76	198.062	0.353833	246.345	0.00172141	2.14026	0.501305	0.0055175	17.5428	0.233045	0.253803	0.001888	0.828514		2619.4	23.6915	3208.64	11.7544	18.3642
11.2	469.242	413.292	0.880766	256.855	3.82761e-05	0.0466384	0.636861	0.00686433	23.665	0.26323	0.269501	0.00074062	0.969		3176.67	27.0336	3303.12	4.31045	3.82831
12.1	271.799	225.398	0.829282	156.382	-	<0.01	0.669724	0.00756127	24.6722	0.28551	0.267184	0.000678423	0.97563		3304.81	29.1923	3289.57	3.98686	-0.463033
13.1	282.31	166.871	0.591091	161.754	9.49975e-06	0.0115891	0.66686	0.00753605	24.6867	0.287024	0.268489	0.000733913	0.97197		3293.74	29.1449	3297.22	4.28946	0.105511
14.1	291.855	249.086	0.853458	133.065	0.000130608	0.161381	0.529851	0.0106938	18.8548	0.544691	0.258088	0.00533447	0.698637		2740.82	45.0611	3235.07	32.592	15.2779
15.1	1402.18	101.882	0.07266	557.019	8.70127e-05	0.119711	0.461851	0.00474751	11.4232	0.120458	0.179385	0.000421931	0.974806		2447.72	20.9354	2647.19	3.90293	7.53507
15.2	183.086	124.74	0.68132	106.06	-	<0.01	0.674297	0.00788685	25.3346	0.324993	0.272497	0.00143553	0.911785		3322.44	30.3661	3320.45	8.252	-0.0597529
Notes :		1. Uncertainties given at the one s level.
		2. f206 % denotes the percentage of 206Pb that is common Pb.
		3. Correction for common Pb made using the measured 204Pb/206Pb ratio.
		4. For % Disc., 0% denotes a concordant analysis.

## Sheet: S6 00BG05
Table DR6. Summary of SHRIMP U-Pb zircon results for sample 00BG05.
									Radiogenic Ratios								Age (Ma)
Grain.	U	Th	Th/U	206Pb*	204Pb/	f206	206Pb/		207Pb/		207Pb/				206Pb/		207Pb/		%
spot	(ppm)	(ppm)		(ppm)	206Pb	%	238U	±	235U		206Pb	±	r		238U	±	206Pb	±	Disc
1.1	109.631	88.7501	0.809533	61.516	0.00107029	1.30122	0.644646	0.00827398	24.1651	0.373574	0.271873	0.00234273	0.830243		3207.25	32.431	3316.86	13.5016	3.30457
2.1	337.828	172.061	0.509315	197.009	1.41189e-05	0.0172234	0.678691	0.00739026	25.1287	0.278607	0.268533	0.000560412	0.982125		3339.34	28.3797	3297.48	3.27481	-1.26943
2.2	73.2897	55.6991	0.759985	42.8449	4.78639e-05	0.0583917	0.680079	0.00914721	25.1769	0.356244	0.268498	0.00117967	0.95057		3344.66	35.0976	3297.28	6.8945	-1.43713
3.1	147.032	98.3991	0.669234	85.8709	1.88407e-05	0.0229791	0.679656	0.00813781	25.1791	0.311888	0.268688	0.000852641	0.966627		3343.04	31.2324	3298.39	4.97923	-1.35388
3.2	84.9114	79.6977	0.938598	49.5706	-	<0.01	0.679539	0.00922657	25.3015	0.360852	0.270041	0.00117877	0.952011		3342.59	35.4135	3306.26	6.8451	-1.09879
4.1	117.526	82.2869	0.700157	70.8864	-	<0.01	0.702076	0.008851	25.9825	0.340901	0.268408	0.000975594	0.960861		3428.52	33.5221	3296.75	5.70393	-3.99693
5.1	474.437	394.465	0.831439	270.528	3.53558e-05	0.0430445	0.663442	0.00721091	24.7152	0.277416	0.270185	0.000757285	0.968321		3280.51	27.9448	3307.1	4.39494	0.803969
6.1	693.861	523.538	0.754529	508.784	0.0104914	12.4326	0.747412	0.0516631	30.8913	6.07092	0.299761	0.0551464	0.351724		3597.97	190.591	3468.99	284.989	-3.71817
7.1	157.357	171.958	1.09279	91.5669	7.5152e-05	0.0915438	0.676721	0.00847173	25.1705	0.351602	0.269762	0.00167182	0.896196		3331.76	32.5709	3304.64	9.71948	-0.820699
8.1	356.744	257.93	0.72301	199.128	5.75372e-06	0.00702311	0.649683	0.00711039	24.0092	0.267888	0.268025	0.000582022	0.980879		3226.96	27.785	3294.5	3.40832	2.05008
9.1	776.719	369.615	0.475866	415.707	4.12653e-05	0.0510533	0.622669	0.00646087	22.0649	0.233688	0.257007	0.000545436	0.979717		3120.53	25.6672	3228.45	3.34823	3.34272
9.2	107.771	84.5484	0.784519	57.5702	2.05445e-05	0.0250244	0.621646	0.00825383	23.1229	0.323633	0.269772	0.00119452	0.948639		3116.47	32.8109	3304.7	6.94432	5.69594
10.1	384.868	221.513	0.575556	263.622	0.00464772	5.73832	0.751556	0.00938176	27.0384	0.682586	0.260926	0.00572545	0.494478		3613.24	34.5286	3252.31	34.5535	-11.0978
11.1	169.829	109.794	0.646501	97.4325	1.46741e-05	0.0178981	0.667684	0.00804357	24.7317	0.306396	0.268647	0.000776419	0.972409		3296.93	31.0923	3298.15	4.5349	0.0369126
12.1	426.095	224.154	0.526065	238.228	3.20425e-05	0.0389724	0.650539	0.00693195	24.3077	0.262643	0.271	0.000484958	0.98619		3230.31	27.0737	3311.82	2.80498	2.46126
13.1	276.728	200.318	0.723881	153.766	1.61187e-05	0.0195921	0.646663	0.00719453	24.2101	0.27689	0.271529	0.000719696	0.972775		3215.16	28.1654	3314.88	4.15362	3.00838
14.1	398.855	624.526	1.5658	228.333	4.39346e-05	0.0535571	0.666005	0.00714392	24.7141	0.270765	0.269132	0.000600201	0.979063		3290.43	27.6426	3300.97	3.49856	0.319291
15.1	118.735	85.726	0.721993	69.435	4.08172e-05	0.0496692	0.68036	0.00839798	25.3842	0.331676	0.270597	0.00115969	0.94468		3345.74	32.2174	3309.49	6.71881	-1.09546
16.1	245.961	169.571	0.689422	141.078	-	<0.01	0.667671	0.00741569	24.9205	0.285035	0.270703	0.000739482	0.971061		3296.88	28.6655	3310.1	4.28241	0.399467
Notes :		1. Uncertainties given at the one s level.
		2. f206 % denotes the percentage of 206Pb that is common Pb.
		3. Correction for common Pb made using the measured 204Pb/206Pb ratio.
		4. For % Disc., 0% denotes a concordant analysis.

## Sheet: S7 10GR02
Table DR7. Summary of SHRIMP U-Pb zircon results for sample 10GR02.
									Radiogenic Ratios								Age (Ma)
Grain.	U	Th	Th/U	206Pb*	204Pb/	f206	206Pb/		207Pb/		207Pb/				206Pb/		207Pb/		%
spot	(ppm)	(ppm)		(ppm)	206Pb	%	238U	±	235U		206Pb	±	r		238U	±	206Pb	±	Disc
1.1	440.415	149.286	0.338967	258.295	3.82898e-05	0.0451958	0.682361	0.0073245	27.904	0.303463	0.296586	0.0005181	0.987015		3353.41	28.0658	3452.48	2.70941	2.86947
2.1	253.727	199.543	0.786447	150.604	9.21873e-05	0.105763	0.690188	0.00774706	30.6466	0.352261	0.322042	0.000797221	0.976533		3383.33	29.5475	3579.62	3.80462	5.48334
3.1	292.758	241.828	0.826033	180.084	1.13789e-05	0.0134395	0.715919	0.00790859	29.2218	0.33304	0.296034	0.000829921	0.969274		3480.73	29.7112	3449.6	4.34908	-0.902597
4.1	385.568	267.323	0.693324	210.81	0.000449536	0.539608	0.63299	0.00685667	24.6383	0.275436	0.282302	0.000780158	0.968963		3161.4	27.0675	3375.71	4.31078	6.34849
4.2	336.85	221.004	0.656091	208.241	1.00694e-05	0.0118875	0.719505	0.007755	29.4075	0.321517	0.29643	0.000543664	0.98583		3494.19	29.0735	3451.67	2.84476	-1.232
5.1	846.952	573.196	0.676775	501.779	7.38234e-05	0.0873632	0.689018	0.00713818	27.9644	0.29392	0.294357	0.000521795	0.985675		3378.87	27.244	3440.78	2.75176	1.79918
6.1	378.302	111.063	0.293582	215.79	4.11494e-05	0.0485394	0.663648	0.00726281	27.1912	0.312383	0.297159	0.00103866	0.952594		3281.31	28.1424	3455.48	5.41998	5.04049
7.1	1106.75	6367.35	5.7532	386.517	0.00547949	6.87017	0.378586	0.00395738	12.9902	0.154142	0.248857	0.00139751	0.880923		2069.67	18.5051	3177.51	8.89574	34.8649
8.1	205.782	94.8701	0.461022	122.709	1.64243e-05	0.0193418	0.693972	0.0079	28.5715	0.346898	0.298601	0.00126063	0.937599		3397.75	30.0635	3462.98	6.54295	1.88359
9.1	438.026	239.111	0.545883	261.301	3.49191e-05	0.0411987	0.694095	0.00735247	28.4212	0.304477	0.296977	0.000475137	0.988786		3398.22	27.9778	3454.53	2.48109	1.62999
10.1	465.847	169.579	0.364024	278.255	8.82421e-05	0.104218	0.69455	0.00737495	28.3567	0.311003	0.296108	0.000812997	0.968158		3399.95	28.0558	3449.98	4.25921	1.4503
11.1	393.826	294.684	0.748259	193.544	0.000215501	0.260752	0.570554	0.00612112	21.6676	0.241542	0.275431	0.000834115	0.962392		2910.09	25.1244	3337.22	4.73768	12.7988
12.1	567.103	325.99	0.574834	341.474	9.09828e-06	0.0107569	0.700817	0.00805802	28.5184	0.331836	0.295133	0.000527038	0.988153		3423.75	30.5414	3444.87	2.77126	0.61307
13.1	1469	11918.3	8.1132	337.121	0.005455	7.12799	0.248088	0.00259023	7.42216	0.0883848	0.216982	0.00124261	0.87677		1428.61	13.3786	2958.43	9.23848	51.7105
13.2	303.482	1496.84	4.9322	139.282	0.00140613	1.67981	0.525242	0.00604186	20.779	0.299044	0.286922	0.00248151	0.799282		2721.38	25.5358	3401.01	13.4654	19.9832
14.1	659.872	397.824	0.602881	231.305	0.000143754	0.171439	0.40732	0.00425378	16.1581	0.171136	0.287709	0.000507603	0.986028		2202.66	19.485	3405.27	2.74597	35.3163
15.1	970.223	7784.87	8.0238	240.53	0.00504862	6.73386	0.26914	0.00468288	7.49413	0.176523	0.201949	0.00320643	0.738676		1536.44	23.786	2842.01	25.8767	45.9384
16.1	4919.91	4128.91	0.839225	642.12	0.00147154	1.89033	0.149049	0.00246851	4.6894	0.0946719	0.228186	0.00263435	0.820358		895.628	13.8489	3039.37	18.4963	70.5324
17.1	539.232	167.686	0.310972	328.055	1.37452e-05	0.0163154	0.708039	0.00749955	28.4771	0.311492	0.2917	0.00079658	0.968335		3451.06	28.3045	3426.7	4.24354	-0.711002
18.1	407.854	311.439	0.763603	241.829	5.71112e-06	0.00673216	0.69013	0.00743515	28.3316	0.309701	0.297741	0.000550941	0.985569		3383.11	28.3588	3458.51	2.8687	2.18004
19.1	312.541	105.485	0.337507	187.092	2.18273e-05	0.0257895	0.696616	0.00762252	28.4036	0.316587	0.295719	0.000627473	0.981713		3407.8	28.9623	3447.94	3.29209	1.16405
20.1	1016.11	43.0302	0.042348	578.61	6.75907e-06	0.00808855	0.662776	0.00730648	26.0153	0.292449	0.284682	0.000626272	0.980665		3277.93	28.3265	3388.8	3.42817	3.27176
21.1	243.779	83.8142	0.343813	141.212	9.50405e-05	0.112203	0.67351	0.00754656	27.5303	0.318158	0.296459	0.00083897	0.969554		3319.41	29.0696	3451.82	4.38949	3.83594
22.1	1866.19	1305.1	0.69934	1271.3	0.00014434	0.171606	0.791596	0.00813496	31.6935	0.329176	0.290379	0.000436914	0.989451		3758.95	29.2707	3419.64	2.33934	-9.92234
23.1	1977.35	3526.47	1.78343	687.372	0.00189121	2.35891	0.39509	0.00407354	13.69	0.148565	0.251307	0.000850889	0.950082		2146.39	18.823	3193.02	5.3568	32.7785
23.2	562.954	323.573	0.574778	321.457	-	<0.01	0.66467	0.00706707	27.0536	0.298056	0.295201	0.000852029	0.965074		3285.27	27.3671	3445.22	4.47897	4.64291
Notes :		1. Uncertainties given at the one s level.
		2. f206 % denotes the percentage of 206Pb that is common Pb.
		3. Correction for common Pb made using the measured 204Pb/206Pb ratio.
		4. For % Disc., 0% denotes a concordant analysis.

## Sheet: S8 11BBL02
Table DR8. Summary of SHRIMP U-Pb zircon results for sample 11BBL02
									Radiogenic Ratios								Age (Ma)
Grain.	U	Th	Th/U	206Pb*	204Pb/	f206	206Pb/		207Pb/		207Pb/				206Pb/		207Pb/		%
spot	(ppm)	(ppm)		(ppm)	206Pb	%	238U	±	235U		206Pb	±	r		238U	±	206Pb	±	Disc
1.1	475.356	212.787	0.447637	213.537	0.000809532	0.974927	0.517792	0.00573476	19.969	0.233349	0.279705	0.00104238	0.947783		2689.81	24.3569	3361.28	5.8195	19.9767
2.1	1772.34	239.3	0.135019	387.825	0.000935261	1.26605	0.251485	0.00259212	6.60184	0.0712003	0.190393	0.000604339	0.955708		1446.13	13.352	2745.56	5.2187	47.3284
3.1	1706.54	1262.12	0.739574	345.448	0.00705825	9.09593	0.214193	0.00328805	6.73634	0.252675	0.228096	0.00780639	0.409256		1251.12	17.457	3038.74	54.8347	58.8278
4.1	7520.49	2488.58	0.330907	553.412	0.00887499	11.8795	0.0754807	0.00146832	2.09004	0.174193	0.200825	0.0162753	0.233405		469.091	8.80109	2832.91	132.188	83.4414
5.1	851.62	249.795	0.293317	354.8	0.00209672	2.56696	0.472498	0.00496911	17.3675	0.190274	0.266586	0.000818544	0.959924		2494.51	21.7541	3286.05	4.82241	24.088
6.1	718.418	130.372	0.181471	169.697	0.00364414	4.53313	0.262485	0.00320634	9.20367	0.125399	0.254305	0.00153477	0.896545		1502.54	16.372	3211.77	9.53405	53.2175
7.1	1574.23	1759.7	1.11782	333.556	0.00551758	6.80479	0.229854	0.00266514	8.31265	0.175483	0.262293	0.00462712	0.549254		1333.73	13.9696	3260.53	27.7616	59.0947
8.1	362.163	82.7084	0.228373	213.11	5.74171e-05	0.0687046	0.684474	0.00752151	26.8768	0.308712	0.284786	0.000952231	0.956692		3361.51	28.7845	3389.37	5.21033	0.822084
9.1	1785.94	1526.39	0.854668	471.414	0.00484977	6.07096	0.288596	0.00487273	9.94091	0.22036	0.249824	0.00358824	0.761684		1634.51	24.3766	3183.65	22.741	48.6592
9.2	533.026	129.586	0.243115	295.216	4.45832e-05	0.053374	0.644342	0.00740114	25.2629	0.29415	0.284358	0.000542224	0.986499		3206.06	29.0151	3387.02	2.97188	5.34277
10.1	581.267	194.927	0.335349	265.805	0.000992941	1.19808	0.525908	0.00756482	20.1722	0.308062	0.278191	0.00142703	0.941899		2724.19	31.9586	3352.81	8.01546	18.749
11.1	1773.84	557.892	0.314511	290.678	0.00252829	3.18735	0.184666	0.00217091	6.19055	0.0810743	0.243132	0.00140336	0.89764		1092.41	11.8131	3140.59	9.17059	65.2163
12.1	2252.9	663.233	0.294391	342.823	0.00306914	3.9177	0.170188	0.00543598	5.48313	0.202529	0.233668	0.00433444	0.864752		1013.14	29.9461	3077.34	29.625	67.0773
13.1	1007.3	1068.32	1.06058	200.411	0.00438222	5.48964	0.218877	0.0023463	7.51508	0.0914189	0.249019	0.00143198	0.881214		1275.94	12.4091	3178.54	9.10846	59.8577
Notes :		1. Uncertainties given at the one s level.
		2. f206 % denotes the percentage of 206Pb that is common Pb.
		3. Correction for common Pb made using the measured 204Pb/206Pb ratio.
		4. For % Disc., 0% denotes a concordant analysis.

## Sheet: S9 11BBL01
Table DR9. Summary of SHRIMP U-Pb zircon results for sample 11BBL01.
									Radiogenic Ratios								Age (Ma)
Grain.	U	Th	Th/U	206Pb*	204Pb/	f206	206Pb/		207Pb/		207Pb/				206Pb/		207Pb/		%
spot	(ppm)	(ppm)		(ppm)	206Pb	%	238U	±	235U		206Pb	±	r		238U	±	206Pb	±	Disc
1.1	157.435	91.34	0.580174	91.8641	1.39157e-05	0.0166746	0.67909	0.00826475	26.5518	0.335464	0.283573	0.000962052	0.963273		3340.87	31.7303	3382.71	5.28923	1.23704
2.1	514.001	266.763	0.518993	168.435	0.00237845	2.89193	0.370409	0.00401514	13.915	0.162237	0.27246	0.00116985	0.929721		2031.32	18.8872	3320.24	6.72579	38.82
3.1	566.405	447.849	0.790687	247.041	0.00141043	1.70309	0.499044	0.00575317	19.1136	0.3385	0.27778	0.00373445	0.650955		2609.69	24.7407	3350.5	21.0107	22.1105
4.1	278.096	117.232	0.421552	95.371	0.000736091	0.887214	0.395647	0.00448211	15.2181	0.185935	0.278966	0.00127668	0.9272		2148.96	20.7026	3357.15	7.14868	35.9886
5.1	725.62	102.572	0.141358	246.84	0.00297017	3.68431	0.381381	0.00420872	13.4759	0.164922	0.256269	0.00135592	0.901714		2082.73	19.6406	3223.91	8.35045	35.3974
6.1	451.358	243.933	0.540442	151.991	0.00128195	1.54784	0.385903	0.00422395	14.78	0.175902	0.277777	0.00129797	0.9197		2103.8	19.6474	3350.48	7.30272	37.2089
7.1	587.017	413.714	0.704774	180.34	0.00163715	2.01297	0.350402	0.00422059	12.6972	0.23896	0.262808	0.00380036	0.640011		1936.52	20.1478	3263.62	22.7511	40.6635
8.1	549.835	569.557	1.03587	271.153	0.000884683	1.06548	0.567918	0.00612907	21.9026	0.248256	0.27971	0.000968999	0.952147		2899.27	25.1993	3361.31	5.40971	13.746
1.2	629.89	309.423	0.491234	231.961	0.00437657	5.40594	0.405481	0.00445988	14.5596	0.18193	0.260422	0.00154422	0.880233		2194.23	20.4558	3249.26	9.33972	32.47
9.1	346.322	194.994	0.563044	190.412	0.000336596	0.40553	0.63739	0.0070267	24.5293	0.278805	0.279112	0.000772383	0.969909		3178.75	27.6641	3357.97	4.32237	5.33717
10.1	331.849	133.578	0.402526	126.989	0.000754791	0.913466	0.441363	0.00492011	16.7679	0.197285	0.275537	0.00103698	0.947462		2356.74	22.0049	3337.82	5.88738	29.3928
11.1	1091.32	273.706	0.250802	328.386	0.00455406	5.65614	0.330447	0.00370973	11.6652	0.188832	0.256029	0.00298589	0.693515		1840.55	17.9747	3222.44	18.408	42.8834
12.1	624.747	292.541	0.468255	182.11	0.00374754	4.66081	0.323488	0.00347208	11.3522	0.1544	0.25452	0.00212612	0.789161		1806.74	16.9117	3213.1	13.195	43.7696
13.1	187.405	120.243	0.641622	104.781	5.09162e-05	0.0612114	0.650415	0.00769535	25.1815	0.309306	0.280796	0.000926619	0.963235		3229.83	30.0575	3367.36	5.15076	4.08429
14.1	451.706	173.938	0.385069	171.904	0.00198673	2.45611	0.432102	0.00502165	15.403	0.254778	0.258534	0.00304302	0.702593		2315.18	22.6043	3237.8	18.5559	28.4951
15.1	228.344	102.975	0.450965	100.526	0.000106675	0.129421	0.511779	0.00592113	19.2734	0.232855	0.273133	0.00095047	0.957622		2664.22	25.2484	3324.1	5.44943	19.8514
16.1	177.315	101.653	0.573288	94.0032	0.000510932	0.61576	0.613296	0.00740523	23.5877	0.30244	0.278943	0.00120327	0.941708		3083.19	29.5899	3357.02	6.73828	8.15714
17.1	331.508	141.07	0.42554	133.045	0.00215502	2.66938	0.454684	0.0051352	16.1134	0.206412	0.257025	0.00155371	0.881655		2416.04	22.7566	3228.56	9.53684	25.1666
18.1	172.776	95.0392	0.550072	93.4308	6.7275e-05	0.080899	0.628943	0.00761049	24.3318	0.306408	0.280583	0.000978447	0.960894		3145.41	30.1179	3366.18	5.44345	6.55857
Notes :		1. Uncertainties given at the one s level.
		2. f206 % denotes the percentage of 206Pb that is common Pb.
		3. Correction for common Pb made using the measured 204Pb/206Pb ratio.
		4. For % Disc., 0% denotes a concordant analysis.

## Sheet: S10 00SR01
Table DR10. Summary of SHRIMP U-Pb zircon results for sample 00SR-01.
									Radiogenic Ratios								Age (Ma)
Grain.	U	Th	Th/U	206Pb*	204Pb/	f206	206Pb/		207Pb/		207Pb/				206Pb/		207Pb/		%
spot	(ppm)	(ppm)		(ppm)	206Pb	%	238U	±	235U		206Pb	±	r		238U	±	206Pb	±	Disc
1.1	176.619	113.131	0.640537	123.042	3.65779e-05	0.0407917	0.810577	0.00960288	42.0563	0.509233	0.376301	0.000941656	0.978411		3826.89	34.1903	3816.98	3.78471	-0.259595
2.1	122.05	63.0581	0.516656	85.8305	-	<0.01	0.818575	0.0102042	42.8604	0.548784	0.379749	0.00111015	0.973586		3855.3	36.1714	3830.77	4.41746	-0.640323
4.1	186.128	127.576	0.685421	130.889	-	<0.01	0.818558	0.0096699	42.6853	0.515108	0.378206	0.000931907	0.978932		3855.24	34.2778	3824.61	3.72481	-0.80069
5.1	434.21	133.976	0.30855	268.222	0.000258945	0.288775	0.71696	0.00791546	34.9452	0.443742	0.353501	0.00221769	0.869436		3484.64	29.719	3722.15	9.5478	6.38099
6.1	478.313	211.245	0.441645	230.11	0.00223744	2.7412	0.544639	0.00582621	19.9801	0.226044	0.266065	0.000979748	0.945547		2802.84	24.3152	3282.98	5.7848	14.6253
6.2	857.364	527.001	0.614675	354.143	0.00068627	0.837233	0.476781	0.00557761	17.6702	0.23061	0.268796	0.00155502	0.896384		2513.23	24.3473	3299.01	9.0769	23.8188
7.1	471.717	346.427	0.734395	247.512	0.0012471	1.50898	0.601543	0.00671615	22.8878	0.325896	0.275953	0.00243858	0.784111		3036.05	27.0334	3340.18	13.8215	9.10512
8.1	751.863	636.331	0.846338	334.273	0.0121006	14.9066	0.440367	0.00681682	16.2178	0.365926	0.267101	0.00438463	0.686066		2352.28	30.5089	3289.09	25.7759	28.4822
8.2	180.461	117.324	0.650133	124.387	0.000567443	0.632813	0.797244	0.00973787	41.6655	0.522559	0.37904	0.00107903	0.973899		3779.24	34.9281	3827.94	4.30242	1.27238
9.1	264.587	143.15	0.541033	158.318	1.80491e-05	0.0216293	0.696342	0.00777812	27.2194	0.31152	0.283501	0.000706727	0.97599		3406.76	29.5583	3382.32	3.88658	-0.722704
10.1	239.715	51.3115	0.214052	140.348	1.98754e-05	0.022951	0.681346	0.00772057	29.695	0.353087	0.316093	0.00113893	0.952981		3349.52	29.6013	3550.93	5.54893	5.67196
10.2	144.908	90.34	0.623432	96.1182	-	<0.01	0.772095	0.00961893	40.2488	0.526711	0.378077	0.0015145	0.951998		3688.4	34.9911	3824.1	6.05567	3.5486
11.1	78.2839	38.2532	0.488646	55.3502	0.00126151	1.40684	0.811427	0.0108105	42.1943	0.606603	0.37714	0.00203737	0.926715		3829.91	38.4719	3820.35	8.16858	-0.250286
12.1	99.4943	67.5146	0.678578	69.9432	3.87911e-05	0.0432598	0.817929	0.0104097	42.7386	0.604657	0.378969	0.00234185	0.899566		3853.01	36.9129	3827.66	9.33962	-0.66223
13.1	164.92	86.3913	0.523837	113.114	2.23752e-05	0.0249528	0.798163	0.00936206	41.3942	0.496751	0.376137	0.000953851	0.977418		3782.53	33.563	3816.32	3.83555	0.8854
14.1	393.024	33.5291	0.0853105	220.331	0.000423833	0.506677	0.649243	0.00700226	25.583	0.295909	0.285788	0.00119433	0.932448		3225.25	27.3698	3394.84	6.50945	4.99552
15.1	377.003	54.039	0.143338	248.675	6.21656e-06	0.00693271	0.767741	0.00834531	38.3731	0.433083	0.362503	0.00110071	0.963129		3672.54	30.4328	3760.38	4.60946	2.33589
15.2	132.4	68.8351	0.519904	91.7988	-	<0.01	0.807062	0.00974417	41.9363	0.517808	0.376862	0.000974579	0.977822		3814.36	34.7608	3819.23	3.91062	0.127632
16.1	281.167	76.6629	0.27266	161.569	0.00120812	1.44247	0.659234	0.00740389	26.113	0.32701	0.287286	0.00159144	0.89684		3264.18	28.7654	3402.98	8.62334	4.07879
17.1	635.649	45.0484	0.0708699	364.342	0.000309471	0.376353	0.664677	0.00706948	24.8583	0.307747	0.271244	0.00171854	0.859121		3285.29	27.3764	3313.23	9.93	0.843124
18.1	548.462	217.047	0.395737	340.199	0.00523552	6.27788	0.676681	0.00715554	26.6757	0.302992	0.285911	0.00118549	0.930987		3331.61	27.5112	3395.51	6.45819	1.88183
19.1	357.911	44.7233	0.124956	205.074	0.000164786	0.198664	0.665624	0.00716586	25.5571	0.279946	0.278472	0.00056289	0.982826		3288.96	27.7338	3354.38	3.15812	1.95038
Notes :		1. Uncertainties given at the one s level.
		2. f206 % denotes the percentage of 206Pb that is common Pb.
		3. Correction for common Pb made using the measured 204Pb/206Pb ratio.
		4. For % Disc., 0% denotes a concordant analysis.
